# Supplementary material for: Rapid and accurate identification of in vivo-induced haploid seeds based on oil content in maize
Source: PubMed Central journal article supplement — Sci Rep. 2013 Jul 3;3:2129. doi: 10.1038/srep02129 (PMC3699789; doi:10.1038/srep02129), 2013-07-03
Supplement: srep02129-s1.pdf [file srep02129-s1.pdf]

**Rapid and accurate identification of *in vivo*-induced haploid seeds  
based on oil content in maize**

Albrecht E. Melchinger<sup>1</sup>, Wolfgang Schipprack<sup>1</sup>, Tobias Würschum<sup>2</sup>, Shaojiang Chen<sup>3</sup>,  
Frank Technow<sup>1</sup>

<sup>1</sup> Institute of Plant Breeding, Seed Science, and Population Genetics, University of  
Hohenheim, 70599 Stuttgart, Germany

<sup>2</sup> State Plant Breeding Institute, University of Hohenheim, 70599 Stuttgart, Germany

<sup>3</sup> National Maize Improvement Center of China, China Agricultural University, 100193  
Beijing, China

Corresponding author: Albrecht E. Melchinger, e-mail: [melchinger@uni-hohenheim.de](mailto:melchinger@uni-hohenheim.de),

**SUPPLEMENTARY INFORMATION**

**Supplementary Table S1 | Numerical examples**

|                                                        | UH600       |                   |                    | UH601       |
|--------------------------------------------------------|-------------|-------------------|--------------------|-------------|
|                                                        | PDH3 x PDH8 | F103 x F087       | P204 x P211        | S072 x P213 |
| <i>Means<sup>a</sup> (OC in %)</i>                     |             |                   |                    |             |
| $\bar{x}_{\text{♀}}$                                   | 3.76a       | 4.15a             | 3.44a              | 3.35a       |
| $\bar{x}_{\text{♂}}$                                   | 9.91d       | 9.91d             | 9.91d              | 11.63c      |
| $\bar{x}_H$                                            | 4.16b       | 4.56b             | 3.89b              | 3.58a       |
| $\bar{x}_C$                                            | 5.64c       | 6.63c             | 5.88c              | 5.57b       |
| <i>Phenotypic variances (OC in%)</i>                   |             |                   |                    |             |
| $\sigma_H^2$                                           | 0.84        | 1.05              | 0.98               | 0.44        |
| $\sigma_C^2$                                           | 0.61        | 0.26              | 0.22               | 0.30        |
| <i>Threshold for OC-based classification (OC in %)</i> |             |                   |                    |             |
| $t^b$                                                  | 4.50        | 5.50              | 4.75               | 4.40        |
| <i>Haploid induction rate (HIR)</i>                    |             |                   |                    |             |
| GS                                                     | 8.90        | 9.82 <sup>c</sup> | 15.60 <sup>d</sup> | 9.14        |
| OC                                                     | 8.55        | 9.13              | 13.18              | 9.47        |
| R1-nj                                                  | 5.01        | n.d. <sup>e</sup> | n.d.               | n.d.        |
| <i>False-discovery rate (FDR)</i>                      |             |                   |                    |             |
| OC                                                     | 0.18        | 0.21              | 0.30               | 0.10        |
| R1-nj                                                  | 0.21        | n.d.              | n.d.               | n.d.        |
| <i>False-negative rate (FNR)</i>                       |             |                   |                    |             |
| OC                                                     | 0.21        | 0.01              | 0.04               | 0.10        |
| R1-nj                                                  | 0.56        | n.d.              | n.d.               | n.d.        |

Means ( $\bar{x}_{\text{♀}}$ ,  $\bar{x}_{\text{♂}}$ ) of source germplasm (♀) and inducer (♂) as well as means ( $\bar{x}_H$ ,  $\bar{x}_C$ ) and phenotypic variances ( $\sigma_H^2$ ,  $\sigma_C^2$ ) for oil content (OC) of haploid (H) or diploid crossing (C) seeds in four induction crosses in maize, threshold  $t$  for OC-based classification of H vs. C seeds, estimates of haploid induction rate (HIR), false discovery rate (FDR) and false

negative rate (*FNR*) determined from the “gold standard” (GS) and classification based on the OC or the *RI-nj* marker.

- <sup>a</sup> Numbers followed by the same letter in a column are not different from each other at  $P < 0.05$  based on a t-test according to Snedecor and Cochran (1980, p. 97)
- <sup>b</sup> Threshold  $t$  used for classification based on OC
- <sup>c</sup> Extrapolated from the total number of seeds classified based on OC ( $T = C : N_T = 7914$  and  $T = H : N_T = 795$ ) and estimates of the *FDR* and *FNR* determined from the GS test results with a random subset of these seeds ( $T = C : N = 213$  and  $T = H : N = 682$ )
- <sup>d</sup> Extrapolated from the total number of seeds classified based on OC ( $T = C : N_T = 3426$  and  $T = H : N_T = 474$ ) and estimates of the *FDR* and *FNR* determined from the GS test results with a random subset of these seeds ( $T = C : N = 205$  and  $T = H : N = 318$ )
- <sup>e</sup> n.d.= not determined

## Supplementary Table S2 | Numerical examples

| Induction cross                             | Gold standard | Result of test T |               | N <sup>a</sup> | N <sub>T</sub> <sup>b</sup> |
|---------------------------------------------|---------------|------------------|---------------|----------------|-----------------------------|
|                                             |               | OC < <i>t</i>    | OC ≥ <i>t</i> |                |                             |
| (PHD3 x PDH8) x UH600                       | D = H         | 101              | 27            | 128            |                             |
| <i>f</i> = 4.50 %                           | D = C         | 22               | 1288          | 1310           |                             |
| (F103 x F087) x UH600 <sup>d</sup>          | D = H         | 577              | 5             | 682            | 795                         |
| <i>t</i> = 5.50 %                           | D = C         | 105              | 208           | 213            | 7914                        |
| (P204 x P211) x UH600 <sup>c</sup>          | D = H         | 294              | 11            | 305            | 474                         |
| <i>t</i> = 4.75 %                           | D = C         | 24               | 194           | 218            | 3426                        |
| (S072 x P213) x UH601                       | D = H         | 76               | 8             | 84             |                             |
| <i>t</i> = 4.40 %                           | D = C         | 11               | 824           | 919            |                             |
| <i>Classification based on R1-nj marker</i> |               |                  |               |                |                             |
|                                             |               | T = W            | T = P         |                |                             |
| (PHD3 x PDH8) x UH600                       | D = H         | 57               | 71            | 128            |                             |
|                                             | D = C         | 15               | 1295          | 1310           |                             |

Classification of haploid (H) vs. diploid crossing (C) seeds in four induction crosses in maize based on (i) their oil content (OC < *t* or OC ≥ *t*) or (ii) expression of the *R1-nj* marker (W = white vs. P = purple) in their embryo and (iii) the “gold standard” results.

<sup>a</sup> N = number of germinated seeds in “gold standard” test

<sup>b</sup> N<sub>T</sub> = Total number of seeds classified based on OC

<sup>c</sup> Threshold *t* used for classification based on OC

<sup>d</sup> Note that in these crosses only a random subset of seeds was evaluated for the “gold standard” test

|                    |   | T = test result                                     |                                                     |               |
|--------------------|---|-----------------------------------------------------|-----------------------------------------------------|---------------|
|                    |   | H                                                   | C                                                   |               |
| D =<br>true status | H | $P [ T = H , D = H ]$<br><i>True positive (TP)</i>  | $P [ T = C , D = H ]$<br><i>False negative (FN)</i> | $P [ D = H ]$ |
|                    | C | $P [ T = H , D = C ]$<br><i>False positive (FP)</i> | $P [ T = C , D = C ]$<br><i>True negative (TN)</i>  | $P [ D = C ]$ |
|                    |   | $P [ T = H ]$                                       | $P [ T = C ]$                                       | 1             |

**Figure S1 | Contingency table for seed classification.**

Two-way contingency table of a binary classification test T showing the four possible outcomes (H = haploid seed; C = diploid crossing seed).

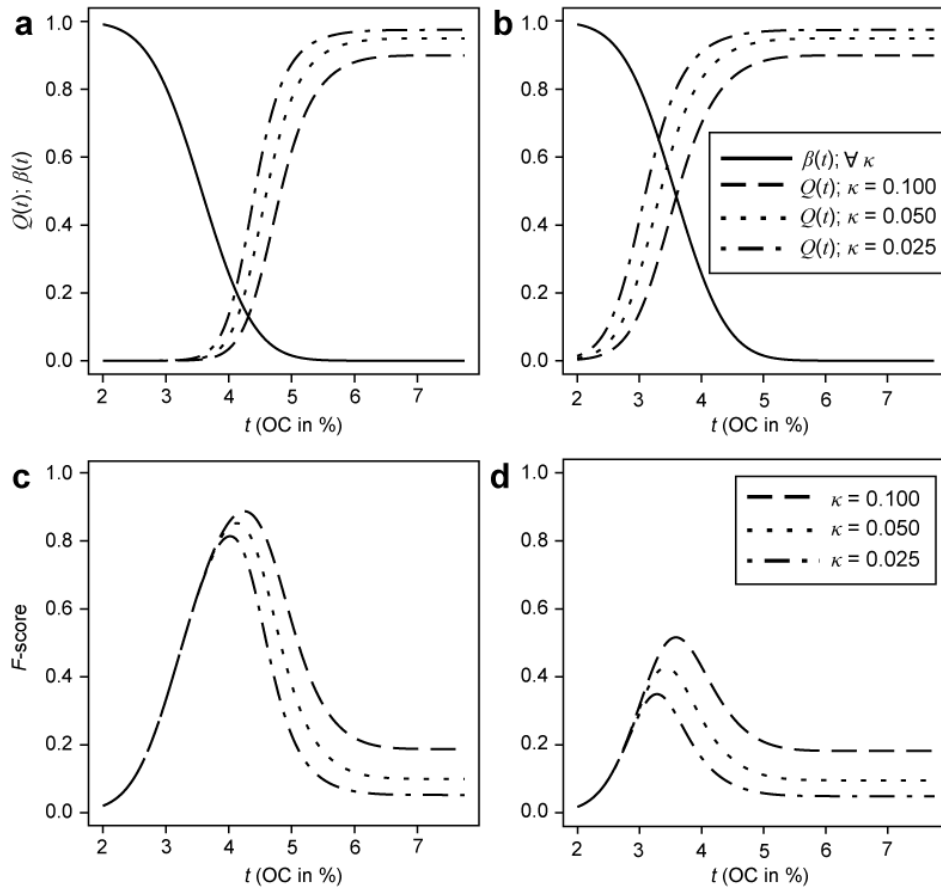

**Figure S2 | Test performance in dependence on the selected threshold  $t$ .**

False discovery rate  $Q(t)$  and false negative rate  $\beta(t)$  (**a,b**) as well as  $F$ -score (**c,d**) for classification of seeds into haploid (H) and diploid crossing (C) seeds based on their oil content (OC in %) as a function of the threshold  $t$  (H:  $OC < t$ ; C:  $OC \geq t$ ). Assumptions are: (i) seeds were produced by pollination with a high oil (HO) inducer having a haploid induction rate (HIR)  $\kappa = 0.100, 0.050, 0.025$ , (ii) H seeds have a mean  $\mu_H = 3.57\%$  and standard deviation  $\sigma_H = 0.55\%$  for OC, and (iii) C seeds have a mean  $\mu_C = 5.51\%$  (**a,c**) or  $4.48\%$  (**b,d**) and a standard deviation  $\sigma_C = 0.66\%$ .

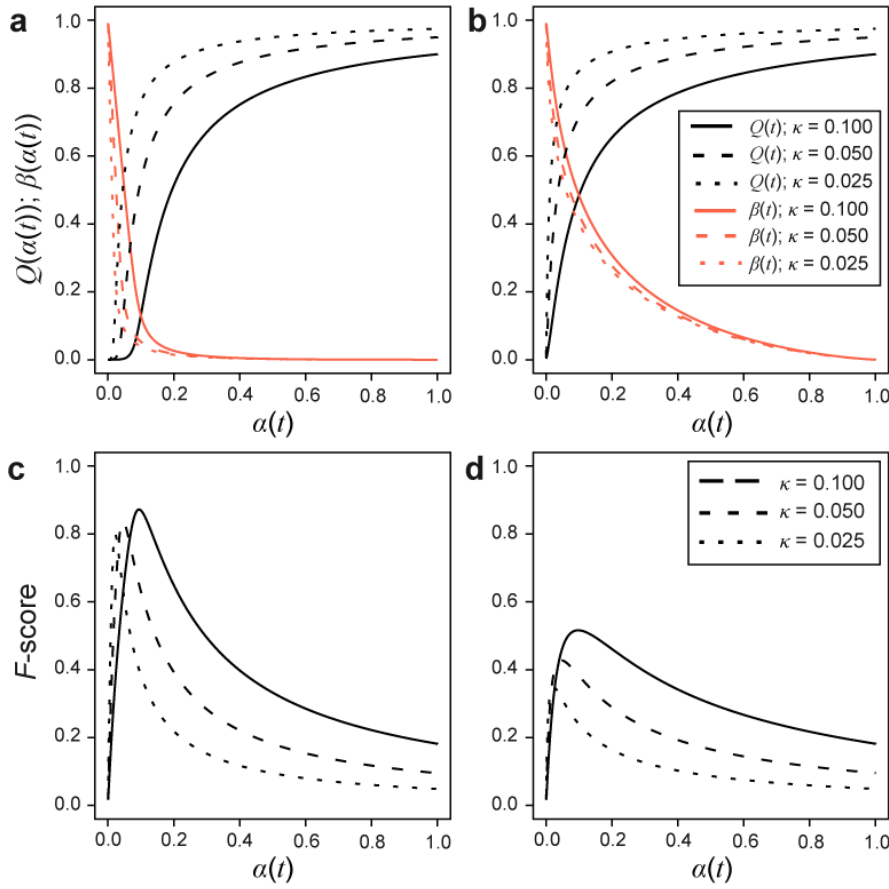

**Figure S3 | Test performance in dependence on  $\alpha$ .**

False discovery rate  $Q(t)$  and false negative rate  $\beta(t)$  (**a,b**) as well as  $F\text{-score}$  (**c,d**) for classification of seeds into haploid (H) and diploid crossing (C) seeds based on their oil content (OC in %) as a function of the proportion  $\alpha$  of selected seeds. Assumptions are: (i) seeds were produced by pollination with a high oil (HO) inducer having a haploid induction rate (HIR)  $\kappa = 0.100, 0.050, 0.025$ , (ii) H seeds have a mean  $\mu_H = 3.57\%$  and standard deviation  $\sigma_H = 0.55\%$  for OC, and (iii) C seeds have a mean  $\mu_C = 5.51\%$  (**a,c**) or  $4.48\%$  (**b,d**) and a standard deviation  $\sigma_C = 0.66\%$  for oil content.
